1 **“It’s no use saying it in English”: A qualitative study exploring community leaders’**  
2 **perceptions of the challenges and opportunities with translating and interpreting COVID-**  
3 **19 related public health messaging to reach ethnic minorities in Australia**

4  
5 Holly Seale<sup>1\*</sup>, Ben Harris-Roxas<sup>1</sup>, Anita Heywood<sup>1</sup>, Ikram Abdi<sup>2,3</sup>, Abela Mahimbo<sup>4</sup>, Lisa  
6 Woodland<sup>5,6</sup>, Emily Waller<sup>1</sup>

7  
8 1. School of Population Health, Faculty of Medicine and Health, University of New South  
9 Wales, Sydney, New South Wales (NSW), Australia

10 2. National Centre for Immunisation Research and Surveillance, Westmead, NSW, Australia

11 3. The Children's Hospital at Westmead Clinical School, Faculty of Medicine and Health,  
12 University of Sydney, Sydney, NSW, Australia

13 4. School of Public Health, Faculty of Health, University of Technology, Sydney, NSW,  
14 Australia

15 5. NSW Multicultural Health Communication Service, South Eastern Sydney Local Health  
16 District, NSW Health, Sydney, NSW, Australia

17 6. Centre for Primary Health Care and Equity, University of New South Wales, Sydney, NSW,  
18 Australia

19  
20 \* Corresponding author

21 Email: [h.seale@unsw.edu.au](mailto:h.seale@unsw.edu.au)

22 Word count: 12,692; Abstract: 300; Main body: 10,779

23

## 24 **ABSTRACT**

25 **Background:** The Australian Government implemented a range of public health response  
26 strategies and communication approaches to reduce the spread of COVID-19; however, concerns  
27 have been raised around a failure to consider culturally and linguistically diverse (CaLD)  
28 communities sufficiently in these processes. This research aimed to understand the factors that  
29 have impacted COVID-19 communication and engagement efforts during the pandemic from the  
30 perspective of key CaLD community stakeholders and community members. A further aim was  
31 to understand the processes that could be adopted to support future communication strategies,  
32 including the promotion of pandemic-related vaccines.

33 **Approach:** This study included 29 key informant interviews with community and faith-based  
34 leaders in New South Wales, Australia.

35 **Results:** The overwhelming message from community leaders was a sense of shared  
36 responsibility between their organisations and the government in communicating pertinent and  
37 accurate COVID-19 related information to CaLD communities. They expressed a sense of duty  
38 to keep their community members safe. While acknowledging this shared responsibility,  
39 community leaders and others shouldered significant costs related to resources and time that  
40 need to be acknowledged by governments in preparing for future disease outbreaks. They felt  
41 that governments should consider: 1) improving communication between governments and  
42 CaLD organisations; 2) responding to the specific CaLD needs with greater agility; 3)

43 foregrounding social media in their communication strategy; 4) reinvesting in local public health  
44 units to know their population; 5) investing in a health ambassadors model program; 6) preparing  
45 a hybrid model of translators/interpreters to fill the gap; and, 7) reimagining vaccine information  
46 campaigns to better target CaLD communities.

47 **Conclusion:** Given the technical details about the COVID-19 virus conveyed in government  
48 information campaigns and the media, ensuring the most vulnerable populations, including  
49 people from CaLD backgrounds, access clear, concise and timely public health messaging from  
50 both governments and community organisations requires further attention.

51

## 52 INTRODUCTION

53 Much has been written about the impact that the global COVID-19 pandemic has had on  
54 vulnerable communities, particularly ethnic minority populations (the convention in Australia is  
55 to refer to such groups as culturally and linguistically diverse populations (CaLD), and thus we  
56 will be using this term throughout the paper) [1-5]. Numerous studies have documented the  
57 heightened risk from SARS-CoV-2 and the disparity in COVID-19 cases and deaths amongst a  
58 diverse group of migrants, refugees, and asylum seekers and other ethnic groups [6,7]. Evidence  
59 suggests that in some settings, these at-risk groups of migrants have been excluded from the  
60 national response [2,5]. Several factors have contributed to this, including a lack of consideration  
61 and tailoring given to the needs of CaLD population groups within pandemic response strategies  
62 and inaction amongst governments to ensure that resources are not only available in wide range  
63 of languages but are also culturally relevant [6]. Reviews focused on the quality of COVID-19  
64 communication materials have highlighted either a lack of resources on disease prevention for

65 some migrant population groups (people in refugee camps or informal settlements), limitations in  
66 the number of languages information was translated into, or issues with the complexity  
67 (readability, understandability, actionability) of information or issues with the quality of the  
68 translations [2, 8-9]. Studies from Denmark, Australia, Canada, and the US have documented  
69 delays in the availability of official guidance in relevant languages for the respective countries  
70 and issues with the approaches used to disseminate resources into CaLD communities, with a  
71 particular focus on groups with lower language and literacy levels, or communities with oral  
72 languages [3, 10-11]. These issues are heightened amongst older people from CaLD  
73 backgrounds, which can be attributed to their inability to search for health information online  
74 and a communication gap between the adults from CaLD backgrounds and the public health  
75 information dissemination system [12]. CaLD populations can be left behind in their access to  
76 and understanding of recommendations, compounded by cultural discordance and mistrust of  
77 health institutions [13].

78 In Australia, English is the dominant language; however, many people speak a language other  
79 than English within their families and communities. There are over 200 languages spoken in  
80 Australia, including over 50 actively spoken Australian Indigenous languages. The availability of  
81 information in other languages often depends on the size of the community, the level of  
82 community infrastructure, and engagement of the community with health services around other  
83 health-related issues. In Australia, speakers of languages with sizeable numbers of practitioners –  
84 Mandarin, Arabic, Vietnamese, Cantonese, or Greek, may glean information from national- or  
85 community-based radio stations and newspapers, among other modes of communication. But  
86 other communities are classified as linguistic minorities which do not have this level of  
87 community infrastructure. Research has found that people from CaLD communities identify

88 strategic stakeholders (referred to in this paper as ‘information intermediaries’) for disseminating  
89 information within groups [14,15]. Information intermediaries could include staff from  
90 community organisations, community or religious leaders, bilingual case or youth workers or  
91 ‘natural’ leaders (for example, a person who has completed medical training but does not  
92 practice in Australia) across the age spectrum. Through influencing the flow of information,  
93 information intermediaries shape and inform their community’s reality and knowledge in a  
94 culturally appropriate and salient manner.

95 While guidelines and reports highlight the crucial role of these ‘information intermediaries’ in  
96 supporting communities during the COVID-19 pandemic, less is known about the experiences of  
97 these information intermediaries in terms of their perceptions of the COVID-19 response, the  
98 needs of their communities and their experiences in ‘bridging the gap’ between levels of  
99 government and the community in communicating pertinent COVID-19 information. Given the  
100 concerns about the Australian Government insufficiently considering the needs of CaLD  
101 communities in their public health response strategies and communication approaches to reduce  
102 the spread of COVID-19, this research aimed to understand the factors that have impacted  
103 COVID-19 communication and engagement efforts during the pandemic from the perspective of  
104 key CaLD community stakeholders and community members. A further aim was to understand  
105 the processes that could be adopted to support future communication strategies, including the  
106 promotion of pandemic-related vaccines, as proposed by CaLD information intermediaries.

## 107 **METHODS**

108 Semi-structured, in-depth phone interviews with people who self-identified as community or  
109 religious leaders, which were approximately 30-40 minutes, were undertaken between March  
110 and September 2021. The focus was on CaLD communities that include people born in mainly

111 non-English-speaking countries, and where English is not the primary language spoken at home  
112 [14]. The Human Research Ethics Advisory Panel at the University of New South Wales  
113 reviewed and approved this study (HC200776). Informed verbal consent was collected from all  
114 participants.

## 115 **Sampling**

116 We worked with a range of key organisations including migrant resource centres, refugee health  
117 services, settlement services, peak bodies and community-based organisations, and government  
118 organisations, to promote the study opportunity to known leaders within their networks.  
119 Information was sent out via these networks, with potential participants encouraged to connect  
120 with the research team for further information or to express interest. Participants were only  
121 included in the study when full verbal consent had been received. This study did not collect any  
122 identifiable personal information from the participants. Recruitment for this study was targeted  
123 to those living within New South Wales, Australia.

## 124 **Data collection and analysis**

125 An interview guide was developed and reviewed by the researchers to identify critical areas of  
126 interest for the study. The questions related to the following topics: perspectives towards the  
127 current communication approach being used by the government, factors affecting  
128 communication and engagement with CaLD communities, the communication roles and  
129 influences of different agencies, and suggested options that could be adopted to enhance  
130 communication and engagement around the COVID-19 vaccine program. Questions were asked  
131 in an open-ended manner to allow room for expansion [16].

132 Thematic analysis is a method for identifying themes and patterns of meaning across a dataset in  
133 relation to a research question; possibly the most widely used qualitative method of data  
134 analysis [17]. A six-step thematic analysis qualitative framework developed by Braun and Clarke  
135 guided data analysis [18]. The first investigator reviewed a small selection of transcripts for early  
136 themes and concepts, from which the preliminary coding scheme was constructed, and then a  
137 second investigator coded all transcripts, revising the scheme iteratively to reflect emergent  
138 themes from interview responses. QSR International's NVivo 12 qualitative data analysis  
139 software was used to code all transcripts, categorise the data and facilitate comparison of  
140 participant views. A third investigator independently coded at least 20% randomly selected  
141 interviews to ensure coding consistency. The investigators convened to share their categories;  
142 any discrepancies found were resolved through discussion and negotiated consensus. Data  
143 analyses and interpretation were iterative, and all investigators participated in this process, to  
144 identify and agree upon emergent themes, and discuss their face validity. Two of the seven team  
145 members identify as coming from CaLD communities, and their input was invaluable in ensuring  
146 relevancy to broader CaLD communities.

## 147 **RESULTS**

148 Twenty-nine interviews were undertaken with community and faith leaders based in New South  
149 Wales. The characteristics of the participants and the interviews are described in Appendix 1  
150 using the CORE-Q reporting format [19]. The themes identified that apply to how government  
151 communication with multicultural communities include: 1) "*They know nothing*": understanding  
152 the language and generational divide affecting CaLD populations; 2) "*I expected a lot more*  
153 *engagement*": critically assessing the government's engagement with CaLD communities; 3)  
154 "*How much perfection do we need?*": expressing support for the government's engagement with

155 the CaLD community; 4) *“Bridging the gap”*: CaLD communities leaders stepping up; 5) *“With*  
156 *some translation I would cringe”*: quality and scope of translations matter; 6) *“Most of them are*  
157 *tuning into overseas stations”*: relying on overseas health messaging among CaLD communities  
158 in Australia; 7) *“You can’t reach them by the traditional way”*: harnessing social media; and 8)  
159 *“The people really want to know the truth”*: challenges of communicating complex medical  
160 information to CaLD communities. These themes are described in detail below.

161 ***1. “They know nothing”: Understanding the language and generational divide that impacts***  
162 ***CaLD populations***

163 While the CaLD communities are important and valued members in Australian society, their  
164 diversity and heterogeneity present unique challenges in ensuring accurate public health  
165 messaging is accessible for all. One of the community leaders simply stated: “Within the non-  
166 English speaking communities, there are some people that require more support than others”  
167 [Community Leader (CL) 06]. Two of the most notable challenges highlighted by the community  
168 leaders who participated in this research was: 1) an English language divide, where basic English  
169 proficiency was not sufficient – or absent - to fully understand the rapidly evolving public health  
170 messaging; and 2) a generational divide, where accessibility to quality translations of public  
171 health information was limited, especially in the absence of internet use and social media  
172 proficiency.

173 Our participants noted that some CaLD community members have basic English language  
174 proficiency, though many depend on community language newspapers or community language  
175 radio stations (such as SBS [Special Broadcasting Service] in Australia), rather than mainstream  
176 English-language news outlets [CL 03, 16, 21]. “The majority of migrants [only] have basic  
177 English language skills, so they need a lot of support. They need the information to be

178 translated...so they can read it and understand it well” [CL 21]. Another community leader  
179 noted, “They stick to their own people... They’re quite happy with their own language among  
180 their own people. It’s easier for them to receive the information in [their community language]  
181 rather than in English” [CL 16]. Furthermore, it was reported that some people from CaLD  
182 backgrounds do not have high levels of education, and may even be illiterate in their own  
183 language, and require complex public health information to be distilled into more simple and  
184 clear instructions [CL 04, 05, 15].

185 Ageing populations with the CaLD communities was also raised several times by community  
186 leaders as a major factor in considering how to disseminate public health information. Besides  
187 language, they are impacted by a digital divide – unable to navigate the internet to access critical  
188 public health information, despite some community training efforts [CL 03]. While some elderly  
189 people from CaLD backgrounds have family in Australia able to offer support, others are  
190 isolated and have limited outreach avenues [CL 17]. “How much do [older people from CaLD  
191 backgrounds] know about what’s going on?...[W]hen I would go for walks in my  
192 [neighborhood], I’ve been curious to ask [older] people, what do they know? They know  
193 nothing” [CL 17].

194 Older people from CaLD backgrounds need special consideration, especially in historically  
195 insular communities where CaLD communities migrated to areas for manufacturing industry  
196 jobs nearly half a century ago. As a result, there emerged a large migrant community that meant  
197 immersing themselves in the English language was unnecessary. “When they were coming 40 -  
198 50 years ago, there was no need for them to know any English at all, they would get a job and  
199 work for decades, without them learning too much English. Then because there was so many of  
200 them, they didn’t need to learn English” [CL 11]. However, as the population has aged,

201 accessing information has become more challenging, relying on overseas information in their  
202 community language, which may not bear much use in the Australian context [CL 11]. The  
203 intersection of how people from CALD backgrounds, English translations and interpretation,  
204 generational differences, the role of the internet, and technical public health information played  
205 out during the pandemic in Australia will be explored in more detail in the themes that follow.

206 ***2. “I expected a lot more engagement”: Critically assessing the government’s outreach to***  
207 ***CaLD communities***

208 Feedback from community leaders was largely critical of the government’s COVID-19  
209 engagement and communication efforts with CaLD communities. There was a general sense of  
210 frustration with how essential public health information was disseminated to CaLD communities,  
211 with many community leaders pointing to limited resources that were translated into languages  
212 other than English, poor quality translations (see theme below on “Quality of translations  
213 matter”), and lack of outreach to the community organisations. One respondent described the  
214 dissemination of government public health messaging as “poorly” [CL 11]. Another leader  
215 noted, “There were no information reaching the multicultural community, especially, the non-  
216 English speaking backgrounds” [CL 06]. Another observed that information about vaccines was  
217 limited. “I did not see much engagement with the community about the vaccination, I must  
218 say...I [would have] expected a lot more engagement; a lot more” [CL 17]. This respondent  
219 pointed to the daily eleven o’clock TV COVID-19 news updates as the most notable engagement  
220 with community [CL 17]; though such outreach would only reach a section of the community  
221 with higher levels of English proficiency.

222 Participants did acknowledge that while the beginning of the pandemic was worse in terms of  
223 accessing information, communication did improve as the pandemic unfurled and new learning

224 emerged. “[Information] wasn’t that great at the beginning. There was a lot of individual work of  
225 the community to convey the message. The government wasn’t doing much in that regard” [CL  
226 21]. Though participants acknowledged that during the second lockdown, availability of  
227 information in community languages improved. However, there remained an information gap  
228 that was filled by community members stepping in to translate key messages, such as general  
229 public health statistics, lockdown rules, and other relevant updates. “I knew a few people who  
230 are doing it themselves, without pay, without anything, [with] nothing, just the individual - They  
231 were volunteering to do it” [CL 21]. While communication with CaLD communities were  
232 enhanced as the pandemic progressed, several participants cited a lack of a coherent strategy  
233 targeting the diverse CaLD populations and an over-reliance on community organisations to lead  
234 in the delivery of public health messages in different languages continued throughout the  
235 pandemic [CL 20].

236 ***3. “How much perfection do we need?”: Expressing support for the government’s engagement***  
237 ***with the CaLD community***

238 Criticism or frustration at the government’s outreach efforts was not shared universally across  
239 our interviewees. Some community leaders expressed satisfaction with how messages about  
240 COVID-19 and translated materials were distributed to CALD communities. “We are fairly  
241 satisfied. Whatever messages we get, we share with our community through our [online  
242 newspaper]...[W]e [also] motivate the people in our community to organise [through] Zoom  
243 meeting[s]” [CL 02]. Online forum meetings was highlighted as an important mode for dispersed  
244 community members across the country to come together and share information regarding  
245 COVID-19. Similarly, others less critical of the government’s response, suggested there needs to  
246 be limits on the number of different languages into which the government is expected to translate

247 information. “I just don’t understand how many languages we need to translate and how much  
248 perfection do we need? It’s an emergency situation” [CL 01]. This respondent also noted that  
249 compared to other places in the world, the ability for the government to cater to a wide-range of  
250 languages should be commended: “Somebody came up with so many translated documents... It  
251 was the best thing that has happened” [CL 01].

252 Other respondents seemed to suggest that ensuring translated documents are created and  
253 distributed must be a shared responsibility between the government and the community, and that  
254 the community has a role to play in facilitating the knowledge transfer. Such cooperation may  
255 include volunteering to translate documents on behalf of the government. “Many times we have  
256 taken those documents and got a person to translate it...and then distribute it. What’s the big deal  
257 about it? I can...sit down for half an hour and [translate] it” [CL 01]. However, while some  
258 respondents expressed ambivalence about the task to translate certain documents, others took  
259 issue with the amount of time and skill required to do this work without funding or support.

#### 260 ***4. “Bridging the gap”: CaLD communities leaders and organisations stepping up***

261 Several community leaders used the phrase ‘bridging the gap’ or ‘filling the gap’ when  
262 describing their organisations’ role in disseminating public health messaging to their relevant  
263 communities [CL 09, 20, 21]. Several participants noted that the act of translating, as well as the  
264 act of determining in which networks to circulate the information, was a time-consuming  
265 endeavour, especially those organisations where funding was not available for formal  
266 translations [CL 03]. Leaders representing communities from South Sudan, China, Indonesia,  
267 and Iraq, among others, shouldered extra tasks to ensure that the government’s COVID-19  
268 information reached their respective communities. “There was a lot of individual work of the  
269 community to convey the message. The government wasn’t doing much in that regard. Only now

270 with the second lockdown, we're starting to see more information in community languages" [CL  
271 21]. Some of these community leaders did the translating and interpreting themselves, using their  
272 bilingual fluency (some were fluent in up to five languages) to guarantee messaging reached the  
273 most vulnerable populations, while others engaged colleagues and international students to assist  
274 in translations and interpretations [CL 06, 09].

275 At the start of the pandemic, some community leaders conducted outreach to their communities  
276 by creating social media pages, video and radio content in their community language and sharing  
277 them online [CL 16]. The messages in the videos contained basic public health information for  
278 avoiding the virus, ranging from how to properly wash hands to social distancing etiquette.  
279 While the radio segments were broadcasted to the wider population, the videos were distributed  
280 through a network of smaller organised groups, such a women's groups, etc. [CL 16]. Another  
281 leader created a CaLD-community specific COVID Emergency Facebook page where  
282 awareness-raising and information sharing was accessible amongst community members [CL  
283 06].

284 While several community leaders stepped up to ensure public health communication had a  
285 further reach, many also acknowledged that this engagement came with a significant time and  
286 resource cost to the individual and/or the organisation [CL 21, see the second theme above]. One  
287 leader noted that they received several phone calls a day from community members requesting  
288 clarification on a number of COVID-related issues, such as vaccines and lockdown rules. "Our  
289 community start[ed] to ask more questions... I receive[d] personally more than - I'm not  
290 exaggerating - 50 to 80 calls every day, people asking me to clarify a few things, which I'm  
291 ready to do it. I'm happy to [give people] the facts" [CL 20]. Fielding phone calls, translating

292 documents, sending messages, and uploading original videos were among the many modes of  
293 communication community leaders initiated to share pandemic-related public health information.  
294 The suite of communication strategies employed by the community leaders were not without  
295 their challenges. For example, when preparing for a radio segment, air time is extremely limited,  
296 necessitating that important, and sometimes complex, public health content had to be distilled to  
297 a concise five-minute timeframe [CL 16]. Another leader noted that trawling through all of the  
298 public health data and information to determine what the most pressing messages required  
299 translation and which dissemination channels to use was time-consuming work [CL 03].  
300 Similarly, reviewing the onslaught of COVID-related messages on the WhatsApp platform was  
301 tedious, and community organisation needed support to navigate the information. “I feel that if  
302 we can have people who actually looked through [the material], and see what’s relevant and  
303 convey that information to our communities, I think that would work” [CL 03]. Such efforts took  
304 preparation and translation time of the respective community leaders, which was not necessarily  
305 reimbursed or part of their roles, though most all community leaders we spoke to indicated they  
306 were prepared to shoulder such work given the extraordinary circumstances of the pandemic and  
307 the desire to protect their communities. However, greater communication between governments  
308 and CaLD community organisations to discuss this shared responsibility and how it can be  
309 properly resourced for future pandemics, and public health campaigns more broadly, is  
310 imperative.

##### 311 ***5. “With some translation I would cringe”: Quality and scope of translations matter***

312 Community leaders emphasised the importance of having high quality translated material in  
313 order to reach the large swaths of their community where English is neither spoken nor  
314 proficient. “It’s no use saying it in English” was the response of one community leader when

315 highlighting the critical need for translated material [CL 15]. Furthermore, participants raised  
316 several important points related to the scope of the translations, in terms of the languages in  
317 which public health information is translated, but also the nuances *within* languages and how  
318 critical it is to take into consideration the wide range of dialects. Finally, several community  
319 leaders highlighted challenges and opportunities related to the process of translating public  
320 health messages, whether through accredited bilingual community educators or through more  
321 informal mechanisms lead by community organisations.

### 322 *The scope of translations*

323 One of the most important decisions governments make in relation to communicating to CaLD  
324 communities is the languages in which outreach material are translated. Whilst governments may  
325 prioritise translations based on census data indicating the highest proportions of languages  
326 spoken in the home, community leaders noted that some groups felt ostracised when their  
327 language is not part of the official list of translated language. “There’s definitely been other  
328 groups that have felt that they’ve slipped in between the cracks, and it was that whole premise of,  
329 ‘Do you translate resources into the languages where there is the vast amount of people? Or do  
330 you go for those languages where maybe there are groups who are at heightened risk or have  
331 particular needs?’ [CL 09]. Participants signaled that smaller CaLD communities may be at  
332 greater risk of pandemic-related harms because of the lack of community infrastructure around  
333 them.

334 As noted in the first theme above, translated material needs to take into account the educational  
335 background of their target audiences. “You’re not translating to people who are educated and  
336 work... You have to be very clear [when you translate]” [CL 04, echoed by CL 15]. In some  
337 cases, translators and interpreters had to deviate from exact translations to make new concepts

338 understandable, such as the use of QR codes to check-in to venues. Others noted that the  
339 technical language associated with some public health information may be challenging for the  
340 average person, and especially those who were not proficient in English. “If I have difficulties  
341 understanding what they’re talking about because they’re using the language that is very  
342 technical, the jargon and all that. What about the common person?... Whether it’s COVID or non-  
343 COVID, this is the problem” [CL 15].

344 Another important translation issue that was consistently raised across our community leaders  
345 was the need for greater attention to the dialects *within* languages. Translations tend to be in the  
346 dominant languages of established CaLD communities. However, several community leaders  
347 advocated for additional resources to reach more diverse language groups, particularly in Indian  
348 and Middle-eastern communities [CL 03, 04 10]. As one community leader noted, even within  
349 seemingly cohesive CaLD communities, there is internal diversity amongst the dialects [CL 04].

350 A community leader representing the Indian community in Sydney noted: “We’re such a large  
351 community and we speak so many different languages...that is the point I would like to stress”  
352 [CL 03]. This participant reported that most translated resources are in Hindi, Tamil or Punjabi.

353 However, they continued: “[t]here are seven other languages that are spoken [in the Indian  
354 diaspora in Australia] which are not addressed... Although it is widely spoken here, not  
355 everybody understands Hindi. That’s where we step in, because we can speak other languages.

356 We use our ambassadors to speak for example, in Gujarati, in Bengali... We use them as  
357 ambassadors to communicate the information in their native language” [CL 03]. This particular  
358 community organisation filled a gap where additional translation and interpretations services  
359 were needed to communicate to community members speaking minority languages.

360 This sentiment was echoed by an Arabic-speaking community leader, who noted the critical  
361 importance of sharing information in several different dialects, whether Chaldean, Ashuri, or  
362 Syrian, among others [CL 10]. Another community leader re-enforced the importance of  
363 knowing which dialect will suit the audience. “For example, [i]n the Arab world, we have 18  
364 countries...If we’re reading a book, it’s all the same language..., but the [spoken] dialect is very  
365 different... When I speak to Iraqis with a group of Sudanese, Lebanese, Tunisians, Kuwaitis or  
366 people from Dubai, I have to modify my language. It’s not the same dialect...[D]ue to the needs  
367 within the Arabic community, you’ll need to adjust your language” [CL 04]. This observation  
368 was reflected by another community member: “The problem is you cannot just translate an  
369 English text to an Arabic text. It doesn’t reflect the exact meaning or the essence of the message’  
370 [CL 19]. While another community member echoed this suggestion, they noted as well that only  
371 educated members of the Arabic community will be able to read documents translated into  
372 Arabic [CL 15]. “I’m finding that if we only rely on the translation of documents, [it’s] a  
373 problem because it’s very hard to translate documents into plain Arabic, especially when we  
374 don’t even have it in plain English. In the Arabic language, if anyone from any of the Arab  
375 countries is to read it, that person has to be educated” [CL 15].

376 Challenges with accuracies *within* languages played out in Chinese communities as well. One  
377 community leader noted that most government communication on COVID-related health  
378 information was translated into simplified Chinese, the written language of mainland China that  
379 emerged in the mid-twentieth century to simplify the more complicated traditional Chinese  
380 characters as a way to promote literacy nationally [CL 09]. However, people from Hong Kong,  
381 Macau and Taiwan, for example, do not read simplified Chinese, they continue to read  
382 traditional Chinese. Furthermore, some migrants from Hong Kong may not be proficient in

383 English despite the historical British colonial rule. CL 09 shared an example from a few years  
384 past when a local government council wanted information translated into simplified Chinese.  
385 When this community leader pushed back that some migrants only read traditional Chinese, the  
386 council responded: “‘Because the statistics show that the majority of the Chinese are from  
387 Mainland China, they go for simplified Chinese.’ Of course, as a member of a small-sized  
388 community, I can’t say too much...[but] I wanted to speak out on behalf of these people” [CL  
389 09]. While this community leader later acknowledged improvements were made during the  
390 course of the pandemic, they did caution that checking translations for accuracy and the  
391 appropriateness of the translated language should remain a priority.

#### 392 *The process of translating public health material*

393 Early in the pandemic, community leader noted that the process to translate COVID-19 health  
394 advice was too slow. “There was no information reaching the multicultural community,  
395 especially, the non-English speaking backgrounds” [CL 06]. Translation procedures could not  
396 keep up with the fast-paced shifts in messaging as the pandemic evolved, sometimes leaving  
397 days between a change in health advice and an official translation being circulated, at which  
398 point some advice was already outdated [CL 22]. “I think [it] took too long to communicate with  
399 the multicultural communities and to get our leaders involved... and [now] we have to be very  
400 quick and fast” [CL 15]. Efforts were undertaken to accelerate the translation and outreach  
401 processes as the pandemic progressed, both by government, especially through the use of  
402 bilingual community educators, and by community organisations (see the fourth theme above on  
403 ‘bridging the gap’).

404 The bilingual community educators, whom Local Health Districts within New South Wales  
405 (NSW) Health regularly engages were seen as an asset in bridging the government’s health

406 advice with the community, providing an important service for communicating health advice to  
407 the wider community [CL 03]. “[Bilingual community educators are] great because they can  
408 speak the languages and they can communicate the information... They’re trained, so [their  
409 services] are very reliable and accurate. I think it’s good to employ bilingual community  
410 educators because the language proficiency may not be as good across the community” [CL 03].  
411 This community leader noted that bilingual educators – as well as GPs – are often tapped to  
412 translate written resources for community organisations or speak to the media, and some feel  
413 these professionals should be utilised more for government translation and interpretation [CL  
414 03]. “Why not use GPs to communicate this information? We use them. We also quite often are  
415 approached by the media, for example, radio, wanting to interview a GP. We do connect them  
416 with GPs who speak other languages” [CL 03]. The expanded role of informal information  
417 intermediaries is highlighted as a potential important component in future pandemic  
418 preparedness with CaLD communities.

419 One community leader emphasised the need for government to reinvest in community  
420 engagement, in knowing one’s population, rather than rely on formal modes of communication  
421 [CL 03]. There may be a missed opportunity to work with the people who are on the ground to  
422 disseminate information, rather than being over-reliant on the hard copy translations. Print  
423 material was especially flagged as being less useful. This participant bluntly noted: “People don’t  
424 read” [CL 03]. While this is certainly an overstatement, it does raise the possibility that other  
425 modes of communication should be foregrounded – social media in particular – for reaching a  
426 wider swath of the CaLD communities (see theme below on harnessing social media). And it  
427 further emphasises the need to focus on short, sharp bits of information, rather than expect  
428 community members to read through detailed health advice. The participant noted that the over-

429 circulating of print material, especially through email, had the opposite effect of its intent. The  
430 “bombardment” of health information emails led to people ignoring them, rather than engaging  
431 with them [CL 03].

432 Another community leader noted the value of bilingual community educators reaches beyond the  
433 simple act of translating. Their intimate knowledge of the community and culture allows for a  
434 more nuanced translation that may take into account people’s level of understanding of  
435 Australian culture and English language ability, education level and/or years in which they have  
436 lived in Australia [CL 16]. There is also an undercurrent of trust between the bilingual  
437 community educators and the community that does not animate well from a generic translated  
438 document. One participant noted that while people from CaLD communities may have a basic  
439 understand of English, they “absorb” more in their community language[CL 16].

440 Where bilingual community educators could not fill the knowledge gap with CaLD communities,  
441 community organisations needed to step in. Community leaders discussed the various ways in  
442 which the translation process unfolds within their organisations. In some cases, it is simply the  
443 leader themselves who takes the initiative to translate and disseminate COVID-19 information.  
444 In other scenarios, there is a more thorough system of checks and balances, where the translator,  
445 editor and proof reader are all separate individuals [CL 04]. “Most of the material we translated  
446 [was] perfect because it will go through different channels. The person translating is not the same  
447 person proofreading it” [CL 04]. For some CaLD organisations, there is a further layer of check  
448 related to cultural or religious sensitivity [CL 15]. While less relevant for COVID-19, it is  
449 important for other health concerns, such as sexually transmitted infections [CL 04].

450 Community leaders expressed frustration at the quality of translations they were seeing in the  
451 community. “In shopping centers, for example, I would pass by a board with some translation

452 and I would cringe sometimes because of the language. I'm not sure if they use Google  
453 translate..." [CL 04]. Another community leader commented similarly: "I did see that there has  
454 been some improvement [in the translated materials] over the year but I just hope that they will  
455 also have somebody to [double] check to see that it is actually the way it should be translated"  
456 [CL 09]. While these two community leaders did not specify if the translated materials were  
457 government endorsed translations, it does point to a general unease with the accuracy of public  
458 health information translations more generally. While there has been criticism about the quality  
459 of translated material, anecdotally, people have also pointed to the original messages in English  
460 being less clear. It's not necessarily just the translations but that the original text wasn't written  
461 in a way to make it easy to translate. However, in raising these concerns, another tension arose  
462 among our participants: whether translator and interpreters should act only if certified by the  
463 National Accreditation Authority for Translators and Interpreters (NAATI)? Assessment fees for  
464 individuals and institutions can range from hundreds to thousands of dollars, respectively, and do  
465 not include the additional course fees which reportedly cost upwards of A\$2000 [20]. Two  
466 community members noted that despite experience in translating and interpretation, they do not  
467 have a license for translation because they cannot afford the fees [CL 04, 09]. "We just speak the  
468 language and we make sure that it's right for the public" [CL 04]. While question remain on  
469 whether accreditation is necessary for all translated material, having someone else – especially  
470 someone from the affected community - to cast an eye over the translation to review it for  
471 accuracy *and* relevancy to the community was suggested. However, there are concerns that  
472 individuals voluntarily undertaking translations themselves could be misinterpreting data,  
473 misrepresenting information, or inadvertently changing meaning, signaling the engagement of  
474 NAATI certified translators is necessary to ensure the validity of translations. Finding the right

475 balance of accuracy, speed, breadth of dialects, and cultural knowledge appeared to be a priority  
476 for the community leaders – and that there needed to be a way forward to use both accredited and  
477 non-accredited translators during public health emergencies.

478 ***6. “Most of them are tuning into overseas stations”: Relying on overseas health messaging***  
479 ***among CaLD communities in Australia***

480

481 Reliance on accessing COVID-19-related health information from overseas was dominant theme  
482 among our community leaders. While some information of a general nature about COVID-19 –  
483 what is the virus, how does it spread, how to wash hands and socially distance - in community  
484 languages was useful; that heavy dependence on information from overseas overshadowed  
485 locally-relevant information about lockdown rules and government support, for example, leaving  
486 some CaLD community members in the dark about how COVID-19 was playing out in  
487 Australia. Representatives of Serbian, Middle Eastern and Indonesian communities, for example,  
488 expressed concern that elderly members of their communities were digesting COVID-19  
489 information exclusively from overseas resources [CL 05, 11, 12, 15, 21]. Older generations of  
490 CaLD communities, in particular, may access their news from overseas newspapers and  
491 streaming TV services, missing critical local information. “There wasn’t proper communication,  
492 I have to say from an Australian perspective, what is happening here, what is available here?  
493 That’s the reality for those elderly [people]” [CL 11]. One community leader noted that as CaLD  
494 populations age, coupled with the heavier reliance on the internet and social media, some local  
495 community language newspapers have been declining in circulation [CL 12]. As a result, they  
496 attract less advertising dollars, and the commercial viability of these news outlets are

497 compromised, cutting off an important source of local information for elderly migrant  
498 community members; hence the reach overseas.

499 Accessing overseas information it is not limited to just older people from CaLD backgrounds.  
500 Newly arrived migrants and refugees also needed better support to access information in  
501 Australia. “The government needed to collaborate a lot with community workers in order for this  
502 message to reach the community...When new migrants come here, they still watch the news in  
503 their own language...whatever they used to watch overseas”[ CL 21; echoed by CL 03 as well].  
504 Access to overseas media continues to occur amongst the general CaLD population as well.  
505 “Talking about the Arabic community, you’ll find that most of them are tuning into overseas  
506 stations. This is a problem we may have because the perception of COVID-19 is so different in  
507 Arab countries and we will never know the truth of the numbers...If we say one thing and then  
508 they’re watching another, the oversea channel and they get another message. It’s a conflicting  
509 situation for them” [CL 15]. In the context of a pandemic, bypassing local mainstream media in  
510 favour of overseas media meant critical public health information was not accessed by members  
511 of the CaLD communities, both young and old.

512 While some overseas information caused confusion amongst CaLD communities, it did have  
513 utility for some community organisations, especially when there was a paucity of translated  
514 materials in Australia. Community leaders acknowledged that they were actively seeking health  
515 information from overseas governments given material was already in the community language.  
516 “Because I speak Arabic, I have access to other Arabic countries’ media, and I found some  
517 material from the Saudi Arabia Health Department. I sent it to [a multicultural organisation] and  
518 to other people saying, ‘use it’ as a model of addressing the issue in Arabic. There is no need to  
519 reinvent the wheel if somebody did something good” [CL 19].

520 At the same time, some community leaders were cautious about accessing overseas information  
521 for fear it would not be relevant to the Australian context. “I access the translated version when I  
522 need to translate it, for example or to proofread it within my role...but normally the fastest thing  
523 is to access whatever you have. It’s always in English because the Arabic one could relate to the  
524 Middle East...I don’t want to give the wrong information while I’m reading something that is  
525 not related to Australia” [CL 04].

526 The concerns about CaLD community members accessing COVID-19 related health information  
527 overseas was not universally shared amongst our community leader interviewees. One  
528 participant acknowledged that while some people may not understand English, the vast majority  
529 were accessing information locally, especially through the daily State government press  
530 conferences during the height of the lockdowns. “Honestly, I don’t access any overseas  
531 information...I wouldn’t bother. What for? Why would they get information from overseas?  
532 Why can’t they get it here? Service New South Wales, if you can download their app for  
533 COVID, the information was there” [CL 07]. Awareness of the potential reliance on overseas  
534 information which may, or may not, be relevant to the local context needs to be a consideration  
535 of pandemic preparedness planning with CaLD communities going forward.

### 536 ***7. “You can’t reach them by the traditional way”: Harnessing social media***

537 There was a resounding agreement amongst the community leaders about the growing  
538 importance of harnessing social media in disseminating critical public health messaging [CL 08,  
539 09, 12, 15, 16, 20, 17, 21]. Mainstream media is no longer sufficient in reaching the majority of  
540 populations groups, especially CaLD communities. “You can’t reach them by the traditional  
541 way. If you want to reach them, you’re going to use platforms like Facebook, Instagram, and  
542 [messaging apps like] WhatsApp [or Signal or WeChat], whatever they use... If you want [to

543 reach CaLD] communities, you're going to have to use social media" [CL 21]. As noted above,  
544 traditional modes of community engagement, such as through local newspapers which may be  
545 produced in community languages, are slowly vanishing under the wave of social media which  
546 lowers circulation numbers leading to a disincentivisation of advertising revenue [CL 12].  
547 During the pandemic lockdowns, community leaders had to shift face-to-face interactions to  
548 online platforms. Welfare and well-being checks would be conducted through text messaging,  
549 and translated recordings by community leaders and organisations about symptoms of COVID-  
550 19 and where to get tested, for example, would circulate on messaging platforms [CL 14].  
551 "Everyone is so attached to their mobile phone for Facebook and WhatsApp. They can listen on  
552 WhatsApp and read through Facebook, and [other social media platforms] like that... The social  
553 media will be the best to reach them, from the young to the old" [CL 16, echoed by CL 08 and  
554 21]. This community leader noted that one must not rely on social media in isolation, however,  
555 and that additional forms of communication, including flyers and radio, also have value in  
556 reaching those who do not access social media [CL 16].

557 Several community leaders used social media platforms and web-based messaging to receive  
558 information, filter it and forward the most important and relevant health information to various  
559 community groups [CL 08, 09, 10]. "I actually receive information from all sorts of different  
560 organisations, government and non-governmental organisations, and from the Senior Services  
561 Agency. I also share with them to my Facebook group so that people are on top of other things"  
562 [CL 09]. One community leader also noted that YouTube videos, in addition to other platforms,  
563 also contain important information in one's own language and dialect and links can easily be  
564 forwarded community members and should be further levered by the government [CL 10]. "The  
565 Arabic translated messages that come from the government, from the Health Department, is not

566 well-presented or well-distributed... I think [health messaging] should go to the Facebook... I  
567 think they should use the Facebook to send it to almost everybody or everywhere - something in  
568 Arabic so that people read it” [CL 12]. The importance of using social media to communicate  
569 information about the COVID-19 vaccine in particular was also raised by several community  
570 leaders. “Facebook is important, everybody sees it” [CL 12; echoed by CL 15, 16 and 21].

571 Community organisations are adapting to provide COVID-related information. One community  
572 group, in conjunction with a multicultural organisation in Western Sydney recorded several  
573 webinars in Arabic, such as “COVID-19 Updates and Hazards, COVID-19 Implications of Self-  
574 Isolation on Family Life, The Impact of Social Media Related to COVID, Improving Immunity  
575 and Treating COVID, and The Road to COVID-19 Vaccination” [CL 12], among others, which  
576 featured eminent doctors and health specialist to disseminate key COVID-19 information to the  
577 Arabic-speaking population of Western Sydney. These webinars were then recorded and posted  
578 on social media, such as YouTube and Facebook, and circulated, increasing their visibility across  
579 the community [CL 19].

580 While some community leaders expressed excitement at the possibilities social media brings in  
581 disseminating information, concerns were also raised by others related to the theme above – on  
582 ‘bridging the gap’ - about the volume of the messages circulating, and resources community  
583 organisations and individuals needed to sift through those messages to find the most relevant  
584 ones to convey to the broader community [CL 03]. Furthermore, while there are clear benefits in  
585 shifting additional resources into increasing the government’s social media engagement, there  
586 are trade-off with these platforms; in particular, the proliferation of false and misleading  
587 information. “People are relying on social media, which is selling all sorts of stories. We had to

588 take it on into our own hands, actually do the work and talk the talk [to inform our community].

589 We did not see much from government [engagement with] the community” [CL 17].

590 There was some disagreement on whether the government’s outreach to CaLD communities was

591 acceptable. One participant frankly noted that outreach, especially through social media, was

592 absent. “I haven’t received one message about COVID-19 and vaccines [in my community

593 language]” [CL 21]. Other participants, however, expressed satisfaction with the outreach and

594 communication strategies employed by the government, remarking that the amount of pandemic-

595 related information available across a number of platforms has been sufficient. “Everywhere you

596 go, information is there... Published, posted, I’m seeing [information] everywhere on social

597 media... I appreciate all these strategies.” [CL 18]. However, this participant did also caution

598 against relying too heavily on print material. “If you want to hide any information from [certain]

599 people, put it in writing, that is a saying” [CL 18]. Several other community leaders were critical

600 of print documents as the dominant mode of disseminating information, noting bluntly that

601 “people don’t read” [CL 3] and “no one reads that” [CL 11]. These community leaders hint that

602 seeking alternative modes of delivery – such as through more targeted social media messaging -

603 may be needed to reach those who avoid print material.

604 Where print and social media fail, the last resort is to engage one-on-one contact in-person or the

605 telephone. “No one reads posters anymore and no one reads emails, the general emails. You have

606 to either give me a call like this, a live person. I need to talk to a live person” [CL 11]. This is the

607 most resource-intensive mode of communication given the costs associated with engaging a

608 person to reach individuals, losing the broad reach of other messaging. “You don’t have the

609 money for [hiring interpreters]. You have money for other stuff. It’s much cheaper to print the

610 poster than to pay a person to go somewhere” [CL 11]. While it is clear that harnessing social

611 media to disseminate critical public health information will need play a very significant part in  
612 future communication strategies, it will not be the *only* part of a strategy. The government will  
613 need to consider how to sunset some forms of communication that may not be relevant in a  
614 couple of generations as more and more people have significant internet use experience, but  
615 having a variety of communication platforms with both significant reach, and also one-to-one  
616 contact will still be required in the years to come.

617 ***8. “People really want to know the truth”: Challenges of communicating complex medical***  
618 ***information to CaLD communities***

619 The rapidly evolving public health information during the pandemic created unique sets of  
620 challenges for outreach efforts to the CaLD communities. Increasingly the challenge of  
621 providing clear, scientifically-based advice in relation to COVID-19 vaccinations emerged. The  
622 evolving data on the efficacy of the newly created COVID-19 vaccines, coupled with intense  
623 media scrutiny on the possible side effects and one’s own personal risk assessments, complicated  
624 the vaccine roll-out for the general population and CaLD communities alike. In discussing the  
625 challenges of communicating complex medication information to their community members,  
626 CaLD community leaders noted they initially struggled to access information about the vaccine  
627 that their community members wanted. While some of the technical information about the  
628 vaccine was available, concerned community members had additional questions about the safety  
629 and efficacy of vaccines – e.g. which vaccine is better? What are the side effects? [CL 08]. One  
630 community leader expressed disappointment in the public health communication, especially  
631 strategies to target multicultural communities. “I am a bit disappointed, because I consider  
632 myself to be relatively highly educated, and I had [feedback from people] who had problems  
633 with understanding what we’re up to [in the pandemic], or getting conflicting messages and

634 thinking the government has been a bit slack in applying and implementing policies, and then  
635 changing their mind. If I'm finding that hard, and I do feel for the rest of the community, or for  
636 people who don't have that certain level of exposure to education" [CL 15, echoed by CL 17].  
637 While broad understanding of the evolving nature of the pandemic was a challenge for most of  
638 the population, information about vaccines represented a flashpoint for misinformation.

639 One community leader emphasised that people want to be informed about the vaccine. "The  
640 people really want to know the truth" [CL 20]. While noting the government was initially not  
641 forthcoming with information about the vaccine targeting CaLD populations, community  
642 organisations "tried to explain to our community the real fact of having vaccine" [CL 20].  
643 However, feeling ill-equipped to answer some basic questions about health messaging,  
644 community members turned away from community organisations and towards other sources of  
645 information on the internet, unhinged from data or facts. The resulting conclusion led to  
646 community leaders fielding a significant amount of phone calls from concerned community  
647 members seeking more information (see CL 20 in the fourth theme above) . Several community  
648 leaders have grappled with how to reduce the spread of false and misleading information about  
649 COVID-19 generally, and the vaccine, specifically. Some community leaders noted that CaLD  
650 community members – older generations in particular - carry skepticism of government  
651 information, a by-product of some migrant and refugee backgrounds previously living under  
652 authoritarian rule where governments could not be trusted. However, while most young people in  
653 the community (20 years and younger) know English and can access information easily, older,  
654 first-generation migrants and refugees, especially those born under dictatorships, "don't believe  
655 what the government says... Everybody's suspicious of everything" [CL 12]. Such distrust in

656 government adds another layer of complexity in reaching older people from CaLD backgrounds,  
657 on top of several challenges already highlighted above.

658 Beyond providing basic health information about vaccines, community leaders suggested that the  
659 COVID-19 vaccine roll-out has not been fair and equitable, and CaLD communities did not  
660 receive enough support in accessing the vaccine [CL 15, 20]. “The leaders have been very slow  
661 to accept when we have to encourage people to do the right thing and get vaccinated. This my  
662 impression, and now we are trying to remedy the situation” [CL 15]. This community leader  
663 went on to note that the government’s COVID-19 response was inequitable. “We can see the  
664 discrimination, we can see the contradiction, the conflict in the messages we have been  
665 receiving. Let alone assistance to get the vaccines. No, it hasn’t been helpful as such” [CL 15].  
666 This community leader suggested that approaching General Practitioners from multicultural  
667 communities should have been a priority in the vaccine roll-out. “The GPs, we should have  
668 perhaps started with some multicultural, ethnic background GPs to get them on board, to say to  
669 people they can go to them [for vaccine information]. It has been very, very vague messaging.  
670 No, I think this is one thing that we missed” [CL 15]. Community leaders suggested CaLD  
671 doctors could strike the right balance of explaining public health information scientifically, but not  
672 too technically, while providing clear, simple advice [CL 15, 22] [21].

673 When it comes to COVID-19 vaccine information, community leaders had one key message: that  
674 vaccine information should come from well-known bilingual medical or health professionals  
675 from the community, who have the relevant public health expertise, and are credible sources of  
676 information [CL 12, 14, 22]. “I believe that community leaders should not go and just pass on  
677 messages related to health... the only people that [pass on public health messages] efficiently are  
678 the community doctors themselves” [CL 22]. While other community members, especially

679 respected elders and faith-based leaders, can support these efforts, their core business is not  
680 health-related messaging and as such, should be secondary – albeit important - sources of  
681 information for the community given their elevated status, after health professionals lead the  
682 advocacy efforts. “[A religious leader] does not have health expertise whereas the message is  
683 more credible if it comes from a health professional” [CL 14]. There were also suggestions that  
684 faith-based leaders may have concerns about the vaccine, and thus are not best-suited to act as  
685 health promoters. “[N]one of [the religious leaders] have been vaccinated...If they don’t believe  
686 [in the vaccine] themselves, how can they spread the message? [CL 14]. Such comments call into  
687 question the possible role that community leaders and faith-based leaders could play as  
688 spokespersons in vaccine information dissemination strategies, which governments have  
689 proposed, and in the case of Victoria, implemented through a Vaccine Ambassadors program  
690 [22]. “I still believe health should deliver that community message through us like bilingual  
691 health workers to deliver the messaging in their first language in the community” [CL 14].

692 At the same time, health professionals are not universally supportive of the COVID-19 vaccine,  
693 with some expressing skepticism about the benefits of the vaccine, and focusing on the potential  
694 harm. It was reported in some communities that some bilingual doctors add fuel to the skepticism  
695 by openly suggesting to patients they “don’t know what’s in the vaccine and the drawbacks” [CL  
696 12]. While such anecdotes deserve greater scrutiny, it does flag that governments and community  
697 organisations must be aware of skeptics within the medical/health profession, as this could  
698 diminish community reach about the scientific basis and efficacy of the vaccine.

699 Some community members offered solutions to addressing the communication challenge in  
700 disseminating vaccine information to CaLD communities. In relation to addressing vaccine  
701 hesitancy among CaLD community members, one community leader noted that providing space

702 for one-on-one consultations with a health practitioner, accompanied by an interpreter, could  
703 have helped to address their concerns about the vaccine [CL 11]. Another community member  
704 suggested simplifying the messaging. “Not many people really understand what is this vaccine?  
705 But by explaining in a simple way and in simple language, they could understand it very easily”  
706 [CL 16]. Another community member noted at the time of interviews as the vaccine roll-out for  
707 the Delta variant (Aug 2021) that the government was ramping up its public health engagement  
708 with CaLD communities. “I didn’t get anything yet about the vaccine...[but] they started saying  
709 that we’ll be expecting lots of work because we are the clinical worker with languages skills, I  
710 think 110 languages. We’ll be expecting information about the vaccination... That’s why I’m  
711 dealing directly with doctors when I need information.” [CL 04]. It was clear from the  
712 community leaders that clear, scientifically-sound public health information delivered by trusted  
713 health practitioners representing CaLD communities was the most effective mode of outreach.

## 714 **DISCUSSION**

715 The overwhelming message from community leaders was a sense of shared responsibility  
716 between their organisations and the government in communicating pertinent and accurate  
717 COVID-19 related information to CaLD communities. Community leaders expressed a sense of  
718 duty to keep their community members safe. While acknowledging this shared responsibility,  
719 however, there were significant costs shouldered by community leaders, other individuals and  
720 organisations related to resources and time that need to be acknowledge by government going  
721 forward in preparing for future disease outbreaks. Further public health information campaigns  
722 that target CaLD communities have several considerations for improving their translating and  
723 interpreting capacity. There are several ideas emerging from discussion with community and  
724 faith-based leaders – the information intermediaries - that governments should consider: 1) better

725 communication between governments and CaLD community organisations; 2) the need for  
726 agility; 3) a suite of modes of communication; 4) reinvesting in local public health units; 5) a  
727 health ambassadors' model; 6) a hybrid model of translators/interpreters; and 7) reimagining  
728 vaccine information campaigns.

### 729 ***Better communication between governments and CaLD community organisations***

730 A tension emerged from our discussion with community leaders, suggesting the government was  
731 placing significant responsibility on community leaders/organisations to get the public health  
732 messaging to communities. To address the discord between government and the community, one  
733 leader suggested more communication between government representatives and community  
734 leaders is required. “When someone [well known] from the community and from the government  
735 sit down together, they can talk. I believe this is how they can deliver [public health messaging]  
736 easier. This is what we’re trying to do... we complete, a little bit, the gap, in communicating real  
737 information with our community” [CL 20]. A more collaborative approach between government  
738 and CaLD communities was echoed by other leaders. “I think it’s a joint responsibility. The  
739 Health Department with all the experts they have to provide the information and rationalise, and  
740 then the main media outlet, like newspaper and the television and other things, as well as the  
741 media targeting the multicultural community. I’m sure also that the ethnic organisations or the  
742 multicultural organisation have a bigger role to play once they are supported and given the right  
743 information and given the right tools to spread the information” [CL 19]. The government  
744 expected community leaders to disseminate key public health messages, and the vast majority  
745 were willing partners in the efforts to inform their people; however, while there was a shared  
746 responsibility, there was not always a shared cost. While community leaders were prepared to

747 ‘bridge the gap’, appropriate funding and support for costs incurred for the significant time and  
748 resources required was an issue repeatedly flagged by the participants.

#### 749 *Need for agility*

750 Agility is not a term typically used to describe government action. However, based on the  
751 general lesson learned about the pandemic [23], and insights from the community leaders  
752 throughout this paper, it is clear that pandemics of the nature and scale of COVID-19, the ability  
753 of government to rapidly shift and pivot based on current data is required for an effective public  
754 health response. Importantly, however, in doing so, is having effective mechanisms in place to  
755 bring the community along with it, especially those from CaLD communities where English  
756 proficiency is limited and trust in governments is strained.

757 It was clear in the early stages of the pandemic that the public was not prepared for the evolving  
758 nature of public health advice (e.g. not wearing masks at the beginning of the pandemic to  
759 safeguard stockpiles for health care workers and patients, to recommending mask wearing by all  
760 members of the public when outside one’s home). In future pandemics, governments need to  
761 make clear with the public at the outset that health advice is not static and will evolve and change  
762 as new data emerges and resources change. In doing so, the community can be prepared for  
763 shifting advice day to day when necessary. Alerting CaLD communities, especially those with  
764 low English language proficiency and less community infrastructure, and the community  
765 organisations that serve them, about the possibility of evolving public health advice will be an  
766 important feature in future pandemic preparedness.

#### 767 *Suite of modes of communication*

768 One of the strong messages from the community leaders is that a suite of communication  
769 strategies is needed to reflect the diversity of CaLD communities, the generational differences in  
770 accessing internet-related information, and those with low levels of English proficiency. While  
771 public health messaging through TV, radio, newspaper and posters must remain part of the  
772 modes of communication strategies, it is clear from our community leaders that CaLD  
773 communities are increasingly engaging with a wider variety of social media platforms to access  
774 and share pandemic-related information. Social media platforms such as Facebook, YouTube,  
775 and WhatsApp were widely cited amongst our participants as popular modes of communication.  
776 The rapid availability of public health information through these platforms was critical to  
777 informing the CaLD communities about the pandemic. However, there were several pitfalls cited  
778 by the community leaders in using social media. First, the source of content was an important  
779 consideration. As noted in the theme above ‘bridging the gap’, community members readily  
780 stepped in to translate and interpret critical public health information and post these resources on  
781 various social media sites. The organisations often did so voluntarily, though this additional  
782 engagement strained many organisation’s resources. Second, access to social media meant the  
783 general public, including CaLD communities, had easy access to a mirage of false and  
784 misleading COVID-19 information. The susceptibility to false information led to further strains  
785 within community organisations to field additional questions about the pandemic. It also led to  
786 concerns about vaccine hesitancy and created challenges to getting the general public on board  
787 for mass COVID-19 vaccine campaigns. Finally, another challenge with social media was the  
788 ease of accessibility to overseas pandemic information that may not have been applicable to the  
789 Australian context. While some CaLD communities may have tuned into overseas TV and radio  
790 programs, the rapid exchange of overseas information in their community language coloured

791 their perception of the pandemic locally. Reviewing and revising public health messaging  
792 strategies will need to place greater attention on the strength of engaging with social media,  
793 while also acknowledging the pitfalls of the platform and mitigating against negative effects  
794 [24]. At the same time, as generations evolve, there may need to be a sunsetting of some more  
795 traditional modes of communication – translated newspapers and radio programs, for example –  
796 in favour of internet-based communication strategies.

### 797 ***Reinvesting in local public health units***

798 One of the important early lessons from the pandemic in Australia was that early and sustain  
799 investment in local public health units made a material difference in how the pandemic play out  
800 in real time, particularly when comparing COVID-19 rates in NSW and Victoria [25,26]. Prior to  
801 the pandemic, NSW’s public health approach was more decentralised, where local public health  
802 units had significant command of their populations. By contrast, the Victorian public health  
803 approach was centralised, leaving public servants based in Melbourne to make decisions across  
804 the state, where knowledge of the local population and area was limited. This dichotomy in  
805 public health approaches across State/Territory lines was a critical difference in the trajectory of  
806 the pandemic [27]. Greater research on how the various local public health responses to CaLD  
807 communities specifically across State/Territory lines is warranted.

808 The CaLD community leaders emphasised the need for governments to reinvest in community  
809 engagement, in knowing one’s population [28]. This could take a variety of forms, including  
810 increased investment in local public health unit outreach with CaLD communities, formalising  
811 more partnerships with community organisations, fostering regular engagement with community  
812 organisations both during the pandemic and non-pandemic periods, and ensuring a very clear  
813 understanding of the cultural and linguistic diversity *within* the community so that no one gets

814 left behind in public health emergency communication strategies. Such investments should not  
815 rest solely on the shoulders of public health, but have wider appeal to other emergency  
816 situations, such as fires and floods, where rapid transmission of urgent information is simply and  
817 clearly communicated to the affected communities, in a language they understand.

### 818 ***Consider a health ambassadors model***

819 The community leaders clearly suggested that public health information should come from health  
820 practitioners, who have the medical and/or public health knowledge, high levels of cultural  
821 sensitivity, and the trust and respect of the local community. Some community leaders expressly  
822 stated that investment in one-on-one engagement is preferable, even if not financially practical.  
823 While resource intensive, governments could consider a variation of a model used in Victoria to  
824 support vaccine uptake, called Vaccine Ambassadors [22]. These ambassadors were trained to  
825 travel door to door to engage with local community members and have conversations about the  
826 vaccine, answering questions about safety and efficacy, and where to access vaccination clinics.  
827 Further research on the impact of these vaccine ambassadors and the potential to broaden their  
828 scope to ‘health ambassadors’ could be a way forward to bridging government public health with  
829 CaLD communities.

### 830 ***Hybrid model of translators/interpreters***

831 The volume and urgency of public health information disseminated to the public led to  
832 community leaders and organisations to step in to fill the gap in reaching CaLD communities. In  
833 doing so, many community leaders noted that they did so given they had the connections to the  
834 community and the language ability to translate and interpret the public health messaging.  
835 However, some acknowledged that they did not have the official NAATI accreditation which

836 recognises trained translators and interpreters. A tension emerged between the need to have  
837 accurate translations and the urgency in which information need to be disseminated. There were  
838 concerns that individuals voluntarily undertaking translations themselves could misinterpret data,  
839 misrepresenting information, or inadvertently changing meaning, signaling the engagement of  
840 NAATI certified translators is necessary to ensure the accuracy of translation. While it is  
841 imperative to safeguard that accreditation, there may need to be a hybrid model where  
842 governments can call on NAATI accredited translators and interpreters, but also informal  
843 translators networks, to disseminate critical health information.

#### 844 *Reimagining vaccine information campaigns*

845 One of the most important lessons to be learned from this COVID-19 pandemic is how to more  
846 effectively develop and implement vaccine information campaigns to reach CaLD communities.  
847 Understanding the effectiveness of public outreach to inform community members and support  
848 their decision-making process is critical to future public health emergencies. Community leaders  
849 emphasised the need for increased outreach to multicultural communities to support their  
850 decision-making about the vaccine [CL 16]. While there may not be one single approach that  
851 will best support CaLD communities, offering them factual, scientifically-based information that  
852 is understandable to the layperson is an important component of any strategy. “The only thing we  
853 have to do is [explain] how to increase our immune system in our body to make ourselves more  
854 healthy” [CL 16]. As noted above in the other themes, harnessing social media, printing flyers,  
855 promoting multicultural health communication on radio and TV, all need to be part of a multi-  
856 prong strategy of vaccine information outreach.

857 To support adoption of government measures including a future COVID-19 vaccine, it is  
858 essential that people can access to, understand, and trust the messaging about COVID-19

859 vaccines, that materials meet the health literacy needs, and communication approaches are  
860 culturally contextualised. Given the ongoing nature of this pandemic, and the possibility of  
861 regular updates to the COVID-19 vaccine going forward, there is an urgent need to strengthen  
862 communication efforts with CALD communities to ensure that community engagement is  
863 enhanced and there is appropriate ongoing adherence with current response strategies and the  
864 introduction of a future COVID-19 vaccine.

## 865 **Conclusion**

866 Culturally and linguistically diverse communities are an important part of the Australian  
867 population and it is imperative that their needs are met as part of the Australian response to  
868 ongoing and future pandemic responses. Unfortunately, evidence suggests that CaLD  
869 communities bore a significant burden in the Australian response to the COVID-19 pandemic  
870 [29]. It is imperative of government, academia, health bodies, and community and faith-based  
871 organisations to heed the lessons learned and ensure that CaLD communities do not get left  
872 behind in future pandemic and public health emergencies, and communication strategies that  
873 include a diverse and flexible approach to reaching CaLD community members should consider  
874 new modes of engagement beyond translation and interpretation services.

875

## 876 **References**

- 877 1. Wild A, Kunstler B, Goodwin D, Onyala S, Zhang L, Kufi M, et al. Communicating  
878 COVID-19 health information to culturally and linguistically diverse communities: insights  
879 from a participatory research collaboration. *Public Health Res Pract.* 2021;31(1).
- 880 2. Seale H, Harris-Roxas B, Heywood A, et al. Speaking COVID-19: supporting COVID-19  
881 communication and engagement efforts with people from culturally and linguistically

- 882 diverse communities. *BMC Public Health* 2022;22(1):1257. doi: 10.1186/s12889-022-  
883 13680-1.
- 884 3. Seale H, Harris-Roxas B, Heywood A, et al. The role of community leaders and other  
885 information intermediaries during the COVID-19 pandemic: insights from the multicultural  
886 sector in Australia. *Humanit soc sci* 2022;9:174.
- 887 4. Mude W, Meru C, Njue C, et al. A cross-sectional study of COVID-19 impacts in  
888 culturally and linguistically diverse communities in greater Western Sydney, Australia.  
889 *BMC Public Health* 2021;21:2018 doi: 10.1186/s12889-021-12172-y.
- 890 5. Ioannides SJ, Hess I, Lamberton C, Luisi B, Gupta L. Engaging with culturally and  
891 linguistically diverse communities during a COVID-19 outbreak: a NSW Health  
892 interagency public health campaign. *Public Health Res Pract.* 2022; Online early  
893 publication.
- 894 6. Hayward SE, Deal A, Cheng C, et al. Clinical outcomes and risk factors for COVID-19  
895 among migrant populations in high-income countries: A systematic review. *Journal of*  
896 *Migration and Health* 2021;3:100041. doi: 10.1016/j.jmh.2021.100041.
- 897 7. Kondilis E, Papamichail D, McCann S, et al. The impact of the COVID-19 pandemic on  
898 refugees and asylum seekers in Greece: A retrospective analysis of national surveillance  
899 data from 2020. *eClinicalMedicine* 2021;37:100958. doi: 10.1016/j.eclinm.2021.100958.
- 900 8. Nezafat Maldonado BM, Collins J, Blundell HJ, et al. Engaging the vulnerable: A rapid  
901 review of public health communication aimed at migrants during the COVID-19 pandemic  
902 in Europe. *J Migr Health* 2020;1:100004. doi: 10.1016/j.jmh.2020.100004.
- 903 9. Mac OA, Muscat DM, Ayre J, et al. The readability of official public health information on  
904 COVID-19. *Medical J of Australia* 2021;215(8):373. doi: 10.5694/mja2.51282.

- 905 10. Guttman A, Gandhi S, Wanigaratne S, et al. COVID-19 in immigrants, refugees and other  
906 newcomers in Ontario: characteristics of those tested and those confirmed positive, as of  
907 June 13, 2020. Institute for Clinical Evaluative Sciences 2020 [cited 10 Mar 2023].  
908 Available from [https://www.ices.on.ca/Publications/Atlases-and-Reports/2020/COVID-19-](https://www.ices.on.ca/Publications/Atlases-and-Reports/2020/COVID-19-in-Immigrants-Refugees-and-Other-Newcomers-in-Ontario)  
909 [in-Immigrants-Refugees-and-Other-Newcomers-in-Ontario](https://www.ices.on.ca/Publications/Atlases-and-Reports/2020/COVID-19-in-Immigrants-Refugees-and-Other-Newcomers-in-Ontario).
- 910 11. Kim HN, Lan KF, Nkyekyer E, et al. Assessment of disparities in COVID-19 testing and  
911 infection across language groups in Seattle, Washington. *JAMA Netw Open*  
912 2020;3(9):e2021213-e13. doi: 10.1001/jamanetworkopen.2020.21213.
- 913 12. Hamiduzzaman M, Siddiquee N, McLaren H, et al. Risk perception and health precautions  
914 towards COVID-19 among older culturally and linguistically diverse adults in South  
915 Australia: a cross-sectional survey. *J Multidiscip Healthc* 2022;15:497-514.
- 916 13. Bergstresser SM. Health communication, public mistrust, and the politics of “rationality”.  
917 *American J of Bioethics* 2015;15:57-59.
- 918 14. Agada J. Inner-city gatekeepers: An exploratory survey of their information use  
919 environment. *J Am Soc Inf Sci* 1999;50:74-85.
- 920 15. Buchanan S, Jardine C, Ruthven I. Information behaviors in disadvantaged and dependent  
921 circumstances and the role of information intermediaries. *J Assoc Inf Sci Technol*  
922 2019;70:117-29.
- 923 16. Richards L. *Handling Qualitative Data*: SAGE Publishing 2014.
- 924 17. Braun V, Clarke V. Using thematic analysis in psychology. *Qualitative Research in*  
925 *Psychology* 2006; 3(2),77–101. doi: 10.1191/1478088706qp063oa.
- 926 18. Braun V and Clarke V. *Successful qualitative research: a practical guide for beginners*.  
927 Sage Publishing 2013.

- 928 19. Tong A, Sainsbury P, Craig J. Consolidated criteria for reporting qualitative research  
929 (COREQ): a 32-item checklist for interviews and focus groups. *Int J Qual Health Care*  
930 2007;19:349-57.
- 931 20. <https://www.naati.com.au>
- 932 21. Lane R. Jamal Rifi: family doctor building bridges in the community. *Lancet*  
933 2022;399:353. doi: 10.1016/S0140-6736(22)00059-9.
- 934 22. Municipal Association of Victoria. Local government COVID-19 vaccination ambassadors  
935 [cited 2023 Mar 10]. Available from [https://www.mav.asn.au/news-](https://www.mav.asn.au/news-resources/campaigns/vaccination-ambassadors)  
936 [resources/campaigns/vaccination-ambassadors](https://www.mav.asn.au/news-resources/campaigns/vaccination-ambassadors).
- 937 23. O’Sullivan D, Rahamathulla M, Pawar M. The impact and implications of COVID-19: an  
938 Australian perspective. *Int J Community Soc Dev*. 2020;2(2):134-51. doi:  
939 10.1177/2516602620937922.
- 940 24. Tjaden, J & E. Haarmann (2022). Promoting COVID-19 vaccination uptake among migrant  
941 communities on social media – evidence from Germany. University of Potsdam and  
942 International Organization for Migration, Berlin 2022 [cited 2023 Mar 10]. Available from  
943 [https://gmdac.iom.int/sites/g/files/tmzbd11416/files/documents/social-media-](https://gmdac.iom.int/sites/g/files/tmzbd11416/files/documents/social-media-study_germany_gmdac_uni-potsdam.pdf)  
944 [study\\_germany\\_gmdac\\_uni-potsdam.pdf](https://gmdac.iom.int/sites/g/files/tmzbd11416/files/documents/social-media-study_germany_gmdac_uni-potsdam.pdf).
- 945 25. Bennett C. Where did Victoria go so wrong with contact tracing, and have they fixed it?  
946 Melbourne: The Conversation; 13 Oct 2020 [cited 2023 Mar 10]. Available  
947 from [theconversation.com/where-did-victoria-go-so-wrong-with-contact-tracing-and-have-](https://theconversation.com/where-did-victoria-go-so-wrong-with-contact-tracing-and-have-they-fixed-it-147993)  
948 [they-fixed-it-147993](https://theconversation.com/where-did-victoria-go-so-wrong-with-contact-tracing-and-have-they-fixed-it-147993)
- 949 26. McAnulty JM, Ward K. Suppressing the epidemic in New South Wales. *N Engl J Med*.  
950 2020;382(21):e74.

- 951 27. Cunningham M. Medical groups plead for overhaul of 'inferior' Victorian public health  
952 system. Sydney Morning Herald 23 Nov 2020 [cited 2023 Mar 10]. Available from  
953 [https://www.theage.com.au/national/victoria/medical-groups-plead-for-overhaul-of-](https://www.theage.com.au/national/victoria/medical-groups-plead-for-overhaul-of-inferior-victorian-public-health-system-20201122-p56grf.html)  
954 [inferior-victorian-public-health-system-20201122-p56grf.html](https://www.theage.com.au/national/victoria/medical-groups-plead-for-overhaul-of-inferior-victorian-public-health-system-20201122-p56grf.html).
- 955 28. Nutbeam D. The vital role of meaningful community engagement in responding to the  
956 COVID-19 pandemic. Public Health Res Pract. 2021;31(1):e3112101.
- 957 29. Ghafournia N, Massey PD, Healey SJR, Ravindran B. Culturally and linguistically diverse  
958 voices and views in COVID-19 pandemic plans and policies. Western Pac Surveill  
959 Response J. 2022 May 2;13(2):1-3. doi: 10.5365/wpsar.2022.13.2.915.

960

## 961 **Declarations**

962 **Competing interests:** None

963 **Ethics approval and consent to participate:** The Human Research Ethics Advisory Panel at  
964 the University of New South Wales reviewed and approved this study (HC200776). All of the  
965 methods used in this study were performed in accordance with the relevant guidelines, outlined  
966 by The National Statement on Ethical Conduct in Human Research, published by the Australian  
967 Government. Informed verbal consent was collected from all participants.

968 **Availability of data and materials:** The datasets generated during and/or analysed during the  
969 current study are not publicly available due to the sensitive nature of the topic raised during the  
970 interviews, but are available from the corresponding author upon reasonable request.

971 **Funding:** The NSW Multicultural Health Communication Unit supported this work.

972 **Authors' contributions:** HS was responsible for the design of the study, for conducting data  
973 collection and analysis; BHR, AH, IA, AM and LW supported the development of the study and  
974 interpretation of the findings. EW supported the analysis of the transcripts.

975 **Acknowledgements:** The research team wish to thank the participants for their support of this  
976 study.

977

978

979 **Appendix 1: CORE-Q Consolidated Criteria for Reporting Qualitative Research**

980

| No                                             | Item                                     | Description                                                                                                                                                                                                             |
|------------------------------------------------|------------------------------------------|-------------------------------------------------------------------------------------------------------------------------------------------------------------------------------------------------------------------------|
| <b>Domain 1: Research Team and Reflexivity</b> |                                          |                                                                                                                                                                                                                         |
| <b>Personal Characteristics</b>                |                                          |                                                                                                                                                                                                                         |
| 1                                              | Interviewers                             | HS, BHR                                                                                                                                                                                                                 |
| 2                                              | Credentials                              | The two interviewers between them hold Bachelor, Master and PhD qualifications in behavioural science, social work, social research, medicine, and public health.                                                       |
| 3                                              | Occupation                               | Academic staff (HS, BHR, AH, IA, AM, LW, EW) and public health practitioner (LW)                                                                                                                                        |
| 4                                              | Gender identity                          | Female (HS, AH, AM, LW, EW), male (BHR, IA). Two participants identify as from CaLD backgrounds (IA, AM)                                                                                                                |
| 5                                              | Experience and Training                  | Experienced researchers and interviewers, have undertaken several qualitative studies, trained in interviewing and qualitative analysis.                                                                                |
| <b>Relationship with participants</b>          |                                          |                                                                                                                                                                                                                         |
| 6                                              | Relationship established                 | None of the interviewees were known to the interviewers prior to the interviews.                                                                                                                                        |
| 7                                              | Participant knowledge of the interviewer | The participants in this study were representatives of the various community and faith-based organisations from across Australia. The interviewers were not known to participants before the interviews were conducted. |

---

|   |                             |                                                                                                                                                                                                                                             |
|---|-----------------------------|---------------------------------------------------------------------------------------------------------------------------------------------------------------------------------------------------------------------------------------------|
| 8 | Interviewer characteristics | Established researchers with experience in vaccination, public health, health services research, primary health care, and culturally diverse health research. Collectively the interviewers have more than 40 years of research experience. |
|---|-----------------------------|---------------------------------------------------------------------------------------------------------------------------------------------------------------------------------------------------------------------------------------------|

---

## Domain 2: Study Design

---

### Theoretical Framework

---

|   |                                       |             |
|---|---------------------------------------|-------------|
| 9 | Methodological orientation and theory | Exploratory |
|---|---------------------------------------|-------------|

---

### Participant Selection

---

|    |          |                                                                                                                                                      |
|----|----------|------------------------------------------------------------------------------------------------------------------------------------------------------|
| 10 | Sampling | Purposive and snowballing, with participants sought across Australia. Participants were also asked to identify other participants to be interviewed. |
|----|----------|------------------------------------------------------------------------------------------------------------------------------------------------------|

---

|    |                    |                                                                                            |
|----|--------------------|--------------------------------------------------------------------------------------------|
| 11 | Method of approach | Emails which included information on the study, participant information and consent forms. |
|----|--------------------|--------------------------------------------------------------------------------------------|

---

|    |             |       |
|----|-------------|-------|
| 12 | Sample size | 30-40 |
|----|-------------|-------|

---

|    |                   |                                 |
|----|-------------------|---------------------------------|
| 13 | Non-participation | 11 participants didn't respond. |
|----|-------------------|---------------------------------|

---

### Setting

---

|    |                            |                                                             |
|----|----------------------------|-------------------------------------------------------------|
| 14 | Setting of data collection | Conducted via online videoconference platform and telephone |
|----|----------------------------|-------------------------------------------------------------|

---

|    |                              |                                                     |
|----|------------------------------|-----------------------------------------------------|
| 15 | Presence of non-participants | No non-participants were present for the interviews |
|----|------------------------------|-----------------------------------------------------|

---

---

|    |                       |                                                                                                                 |
|----|-----------------------|-----------------------------------------------------------------------------------------------------------------|
| 16 | Description of sample | Participants were representatives from CaLD community organisations and groups from New South Wales, Australia. |
|----|-----------------------|-----------------------------------------------------------------------------------------------------------------|

---

|                        |  |  |
|------------------------|--|--|
| <b>Data Collection</b> |  |  |
|------------------------|--|--|

---

|    |                        |                                                                                                                         |
|----|------------------------|-------------------------------------------------------------------------------------------------------------------------|
| 17 | Interview guide        | Provided in advance upon request                                                                                        |
| 18 | Repeat interviews      | No                                                                                                                      |
| 19 | Audio/visual recording | Audio recording                                                                                                         |
| 20 | Field notes            | Limited reflective notes were captured following interviews. These notes were not included in the qualitative analysis. |

---

|    |                      |                                                                                                                                                                                                                                                      |
|----|----------------------|------------------------------------------------------------------------------------------------------------------------------------------------------------------------------------------------------------------------------------------------------|
| 21 | Duration             | Ranged between 20 minutes to 60 minutes                                                                                                                                                                                                              |
| 22 | Data saturation      | Purposeful sampling to ensure range of experiences from across different cultural groups were captured and described. As such sampling continued past basic conceptual/thematic saturation to ensure a range of cultural perspectives were included. |
| 23 | Transcripts returned | No                                                                                                                                                                                                                                                   |

---

|                                        |  |  |
|----------------------------------------|--|--|
| <b>Domain 3: Analysis and Findings</b> |  |  |
|----------------------------------------|--|--|

---

|                      |  |  |
|----------------------|--|--|
| <b>Data Analysis</b> |  |  |
|----------------------|--|--|

---

|    |                       |                                                                                                                                                                               |
|----|-----------------------|-------------------------------------------------------------------------------------------------------------------------------------------------------------------------------|
| 24 | Number of data coders | Initial coding was done by HS and EW. BHR contributed to development and refining concepts identified. Codes, concepts and higher order themes were discussed by all authors. |
|----|-----------------------|-------------------------------------------------------------------------------------------------------------------------------------------------------------------------------|

---

---

|                  |                                |                                                                                                                                                 |
|------------------|--------------------------------|-------------------------------------------------------------------------------------------------------------------------------------------------|
| 25               | Description of the coding tree | No, not necessary given the focus of the analysis is largely descriptive rather than being theory-driven.                                       |
| 26               | Derivation of themes           | Codes and concepts were derived through open coding of interview transcripts, these were then tested and consolidated into higher order themes. |
| 27               | Software                       | NVivo                                                                                                                                           |
| 28               | Participant checking           | No                                                                                                                                              |
| <b>Reporting</b> |                                |                                                                                                                                                 |
| 29               | Quotations presented           | Yes, selectively to illustrate findings                                                                                                         |
| 30               | Data and findings consistent   | Yes                                                                                                                                             |
| 31               | Clarity of major themes        | Yes                                                                                                                                             |
| 32               | Clarity of minor themes        | No, the focus in this paper is on major analytic findings and higher-order themes, given the focus of the study.                                |

---

981

982

983
